# Supplementary material for: Deep Eutectic Solvents as Eco-Friendly Agents for Unlocking Antioxidants from Catharanthus roseus
Source: Research Square preprint supplement (doi:10.21203/rs.3.rs-6388547/v1), 2025-05-19

**Supporting Information**

**Antioxidant Activity of Deep Eutectic Solvent (DES) Extracts of *Catharanthus roseus***

Parul Sharma1, Ramandeep Kaur,2* and Avjot Kaur2

1Department of Chemistry, Oklahoma State University, Stillwater, Oklahoma, USA-74078

2Department of Chemistry, College of Basic Sciences and Humanities, Punjab Agricultural University, Ludhiana, India-141004

*Corresponding author- ramansaini@pau.edu

**Materials and Methods**

**Materials, Reagents, and Equipment**

*Catharanthus roseus* plants were collected from the botanical garden of Punjab Agricultural University, Ludhiana, Punjab, India voucher specimen number K001492812. The leaves and flowers were separated from the twigs, shade-dried, and then powdered using a pestle and mortar. The powdered samples were stored in the dark at room temperature until further use.

The chemicals used for the preparation of DES included choline chloride (Loba Chemie Pvt. Ltd.), citric acid (Loba Chemie Pvt. Ltd.), oxalic acid (Loba Chemie Pvt. Ltd.), urea (Loba Chemie Pvt. Ltd.), glucose (Loba Chemie Pvt. Ltd.), sucrose (Loba Chemie Pvt. Ltd.), 1-naphthylamine (Central Drug House Pvt. Ltd.), glycerol (Sarabhai R Chemicals), and ethylene glycol (Sarabhai R Chemicals). The standards vinblastine sulfate and vincristine sulfate were obtained from United Biotech Pvt. Ltd. (UBPL), India. Most other chemicals used in the study were purchased from Loba Chemie Pvt. Ltd.

The equipment used during the experiment included a magnetic stirrer (Sonar), an oven (The Bharat Instruments & Chemicals), a sonicator (SB-5200 DTDN), and a UV-visible spectrophotometer (Shimadzu UV-1800).

**DES Preparation**

Eight deep eutectic solvents were prepared using choline chloride (ChCl) as the hydrogen bond acceptor (HBA). In specific molar ratios, ChCl was mixed with various hydrogen bond donors (HBDs) such as acids, alcohols, amines, and carbohydrates. The components were placed in a round bottom flask and heated to 80°C while being constantly stirred with a magnetic stirrer until a homogeneous liquid was formed. The resulting clear liquid indicated the formation of a particular DES from its parent compounds. The components, molar ratios, and preparation times for all DES are presented in **Table S1** (Abbott et al. 2006).

**Table S1: Composition and molar ratio of various deep eutectic solvents**

| **Category** | **Deep Eutectic Solvents**  **HBA: HBD** | **Molar Ratio** | **Preparation Time (min)** |
| --- | --- | --- | --- |
|
| **Acids** | ChCl: Citric Acid | 1:1 | 360 |
| ChCl: Oxalic Acid | 1:1 | 20 |
| **Amines** | ChCl: Urea | 1:2 | 60 |
| ChCl: 1-Naphthylamine | 1:2 | 60 |
| **Alcohols** | ChCl: Glycerol | 1:1 | 70 |
| ChCl: Ethylene Glycol | 1:2 | 70 |
| **Sugars** | ChCl: Glucose | 1:1 | 240 |
| ChCl: Sucrose | 1:1 | 290 |

ChCl: Choline Chloride

**Ultrasonic-Assisted Extraction**

The extracts of *C. roseus* leaves and flowers were prepared using an ultrasound-assisted extraction technique with all the DES solvents. Ultrasound-assisted extraction (UAE) relies on the transmission of high-frequency sound waves into the solvent, generating cavitation bubbles that collapse and create localized high-pressure and high-temperature conditions. First, 50 mg of the dried, powdered leaves and flowers were weighed and transferred separately to 25 ml flasks. Then, 10 ml of DES was added to each flask and thoroughly mixed. The flasks were placed in an ultrasonic water bath at room temperature for approximately 40 minutes at a frequency of 50 kHz. The contents were then filtered to obtain the DES extracts of *C. roseus* leaves and flowers (Demir et al. 2024).

**PHYSICAL PARAMETERS**

Different physical parameters of the prepared DES were recorded and their detailed methodology is given below. As almost all the DESs prepared were highly viscous and denser than water. So their different dilutions were prepared in double distilled water *viz* 30, 40 and 50% and the data was recorded.

**Density**

It is one of the most important physical parameter studied for deep eutectic solvents. Densities of most DESs are generally higher than water. Specific gravity bottles also known as density bottles or relative-density bottles were used to determine the liquid densities of DES. First, the weight of empty specific gravity bottle was recorded and then weight of density bottle filled with different DESs and water were determined separately. Then the liquid density of each DES was calculated by measuring the difference between an empty and DES filled bottle and dividing the result by weight of water filled in specific gravity bottle (Pall and Mohsenin 1980). As the densities of pure DES were quite high so the dilutions of DES were made (30, 40 and 50%) and the densities were calculated for each dilution. The dilutions of ChCl: 1-naphthylamine were only made using methanol as this DES was water insoluble due to hydrophobic nature. The density values were taken in triplicate and the results were analyzed by factorial design by applying two way ANOVA.(Abbott, Capper, & Gray, 2006)

**Calculations and formula**

Weight of empty specific gravity bottle = w1

Weight of specific gravity bottle and distilled water = w2

Weight of specific gravity bottle and DES = w3

**Table S2: Densities of dilutions of various deep eutectic solvents in g/ml**

| **S.No.** | **DEEP EUTECTIC SOLVENTS** | **DILUTIONS (% water content)** | | |
| --- | --- | --- | --- | --- |
| **30** | **40** | **50** |
| 1 | ChCl: Urea | 1.117hij ± 0.007 | 1.096kl ± 0.002 | 1.086lm ± 0.004 |
| 2 | ChCl: CA | 1.243a ± 0.001 | 1.214cd ± 0.003 | 1.164f ± 0.004 |
| 3 | ChCl: OA | 1.135g ± 0.003 | 1.127ghi ± 0.003 | 1.117ij ± 0.003 |
| 4 | ChCl: Gly | 1.129ghi± 0.003 | 1.119hi± 0.004 | 1.103jk ± 0.003 |
| 5 | ChCl: EG | 1.115ij ± 0.004 | 1.083lm ± 0.005 | 1.072m ± 0.004 |
| 6 | ChCl: Glu | 1.227bc ± 0.003 | 1.207d ± 0.005 | 1.178ef ± 0.003 |
| 7 | ChCl: Suc | 1.234ab ± 0.003 | 1.191e ± 0.005 | 1.175f ± 0.002 |
| 8 | ChCl: 1-Napht* | 1.165f± 0.002 | 1.141g ± 0.006 | 1.132gh ± 0.004 |

Mean values followed with different superscripts are significantly different (p<0.05) using Tukey’s Test

*ChCl:1-Naphthylamine DES dilutions were made in methanol

**Viscosity**

Viscosity is another important physical parameter of DESs. It is measured by a U shaped tube named as Ostwald viscometer. It consists of two reservoir bulbs which are separated by a capillary. The liquid is added to the viscometer such that the lower bulb on one side is completely filled with the liquid. The liquid is then pulled into the upper bulb with the help of suction which contains two marks A and B, after which the liquid is allowed to drain off by gravity back into the lower reservoir. The time taken by the liquid to pass from mark A (mark above the upper bulb) to mark B (mark below the upper bulb), is measured for various DESs (Beaulieu *et al* 2017). Owing to the viscous nature of each DES three dilutions were prepared: 30, 40 and 50% by using double distilled water except for ChCl: 1-naphthylamine in which methanol was used for the dilutions. The reading for each dilution of DES has been taken in triplicate and the final reading was the mean of all the three readings. Viscosity was measured in centipoise (cP). The results for viscosity were analyzed by factorial design by applying two way ANOVA.

Formula for viscosity,

Where = Viscosity of water

η2 = Viscosity of liquid

ρ1 = Density of water

ρ2 = Density of liquid

t1 = Mean time of flow of water

t2 = Mean time of flow of liquid

**Table S3: Viscosities of dilutions of various deep eutectic solvents in cP**

| **S. NO.** | **DEEP EUTECTIC SOLVENTS** | **DILUTIONS (% water content)** | | |
| --- | --- | --- | --- | --- |
| **30** | **40** | **50** |
| 1 | ChCl: Urea | 119.3t ± 0.45 | 104.7v ± 0.60 | 84.8w ± 0.35 |
| 2 | ChCl: CA | 1631.7c ± 0.45 | 688.7e ± 0.90 | 284.4n ± 1.08 |
| 3 | ChCl: OA | 219.3p ± 0.70 | 158.0r ± 0.70 | 108.3u ± 0.80 |
| 4 | ChCl: Gly | 404.5i ± 0.40 | 364.1l ± 0.65 | 168.1q ± 1.59 |
| 5 | ChCl: EG | 371.3k ± 0.58 | 227.2o ± 0.40 | 140.0s ± 0.26 |
| 6 | ChCl: Glu | 2209.8a ± 0.65 | 867.4d ± 0.30 | 466.0g ± 0.26 |
| 7 | ChCl: Suc | 2085.5b ± 1.15 | 529.3f ± 0.30 | 360.0m ± 0.45 |
| 8 | ChCl: 1-Napht* | 445.2h ± 0.35 | 402.7i ± 0.65 | 381.8j ± 0.62 |

Mean values followed with different superscripts are significantly different (p<0.05) using Tukey’s Test

*ChCl:1-Naphthylamine DES dilutions were made in methanol

**Refractive index**

A refractometer determines the refractive index of a liquid sample by measuring the amount of light bent as it moves from air into the sample. The prism of the refractometer was first cleaned by using acetone and then a small amount of the DES sample was placed on the prism, after which the lid was closed so that the liquid sample gets evenly distributed on the surface of prism. The refractometer was placed towards a light source so that the mirror receives ample amount of light so that the light and dark portions are clearly visible (Shahbaz *et al* 2013). The readings for the refractive index were taken in triplicate for pure DES as well as its dilutions. The results for pure DES were analyzed through completely randomized design by applying one way ANOVA while the refractive index of dilutions were analyzed by factorial design by applying two way ANOVA. (Demir et al., 2024)

**Table S4: Refractive index of pure deep eutectic solvents**

| **S. No.** | **DEEP EUTECTIC SOLVENTS** | **REFRACTIVE INDEX** |
| --- | --- | --- |
| 1 | ChCl: Urea | 1.486d ± 0.001 |
| 2 | ChCl: CA | 1.481e ± 0.001 |
| 3 | ChCl: OA | 1.409h ± 0.004 |
| 4 | ChCl: Gly | 1.454f ± 0.001 |
| 5 | ChCl: EG | 1.451g ± 0.001 |
| 6 | ChCl: Glu | 1.526b ± 0.002 |
| 7 | ChCl: Suc | 1.506c ± 0.002 |
| 8 | ChCl: 1-Napht | 1.532a ± 0.002 |

Mean values followed with different superscripts are significantly different (p<0.05) using Tukey’s Test

**Table S5: Refractive index of various deep eutectic solvents at different dilutions**

| **S.NO.** | **DEEP EUTECTIC SOLVENTS** | **DILUTIONS (% water content)** | | |
| --- | --- | --- | --- | --- |
| **30** | **40** | **50** |
| 1 | ChCl: Urea | 1.428h ± 0.004 | 1.382jk ± 0.005 | 1.371kl ± 0.003 |
| 2 | ChCl: CA | 1.455cde ± 0.004 | 1.441fg ± 0.003 | 1.415i± 0.002 |
| 3 | ChCl: OA | 1.384j ± 0.003 | 1.377jkl ± 0.002 | 1.371kl ± 0.003 |
| 4 | ChCl: Gly | 1.431gh ± 0.005 | 1.378jkl ± 0.003 | 1.371l ± 0.002 |
| 5 | ChCl: EG | 1.384j± 0.004 | 1.375jkl ± 0.004 | 1.310m± 0.005 |
| 6 | ChCl: Glu | 1.462c ± 0.002 | 1.456cd ± 0.001 | 1.448def ± 0.002 |
| 7 | ChCl: Suc | 1.460c ± 0.003 | 1.445ef ± 0.003 | 1.431gh ± 0.002 |
| 8 | ChCl: 1-Napht* | 1.523a ± 0.001 | 1.514ab ± 0.003 | 1.506b ± 0.003 |

Mean values followed with different superscripts are significantly different (p<0.05) using Tukey’s Test

* ChCl:1-Naphthylamine DES dilutions were made in methanol

**pH**

pH strips are the strips of litmus paper which are used to determine the pH value of liquids. The pH of each DES was measured by simple dipping the part of pH paper and comparing the color with standard to record pH for each DES (Skulcova *et al* 2018).

**Table S6: pH of various deep eutectic solvents**

| **S. No.** | **Deep Eutectic Solvents** | **pH** |
| --- | --- | --- |
| 1 | ChCl: Urea | 2.0 |
| 2 | ChCl: CA | 2.5 |
| 3 | ChCl: OA | 7.0 |
| 4 | ChCl: Gly | 7.5 |
| 5 | ChCl: EG | 7.0 |
| 6 | ChCl: Glu | 6.0 |
| 7 | ChCl: Suc | 7.0 |
| 8 | ChCl: 1-Napht | 9.5 |

**Dielectric Constant**

The dielectric constant for all deep eutectic solvents was measured using a dielectric constant meter. The readings of capacitance for each DES was taken at five different frequencies (20, 40, 60, 80 and 100 kHz) using this dielectric meter. The value for capacitance of air was also recorded by taking the readings of an empty capacitor. The dielectric meter also recorded the values of conductance for various DES which were further used for the measurement of ionic conductivities of these solvents (Mukherjee *et al* 2015). All the readings were taken in triplicates. Dielectric constants for all DESs were calculated using formula:

**Table S7: Dielectric constants of deep eutectic solvents at different frequencies**

| **DEEP EUTECTIC SOLVENTS** | **Frequency (kHz)** | | | | | **TUKEY TEST MEAN** |
| --- | --- | --- | --- | --- | --- | --- |
| **20** | **40** | **60** | **80** | **100** |
| ChCl: Urea | 39.6 ± 1.3 | 17.6 ± 0.5 | 7.7 ± 0.4 | 4.8 ± 0.3 | 1.4 ± 0.3 | 14.25c |
| ChCl: CA | 99.6 ± 1.5 | 42.8 ± 2.4 | 18.7 ± 1.6 | 13.2 ± 1.3 | 8.9 ± 0.6 | 36.66a |
| ChCl: OA | 56.9 ± 2.2 | 19.4 ± 1.7 | 5.8 ± 0.6 | 2.2 ± 0.3 | 0.2 ± 0.1 | 16.92c |
| ChCl: Gly | 31.2 ± 1.6 | 9.9 ± 0.8 | 1.6 ± 0.1 | 1.3 ± 0.1 | 0.5 ± 0.1 | 8.93d |
| ChCl: EG | 15.9 ± 1.1 | 9.4 ± 0.3 | 6.6 ± 0.4 | 3.5 ± 0.3 | 1.5 ± 0.2 | 7.40d |
| ChCl: Glu | 33.7 ± 1.3 | 16.7 ± 0.6 | 7.7 ± 0.4 | 5.7 ± 0.5 | 2.4 ± 0.5 | 13.26c |
| ChCl: Suc | 88.1 ± 1.4 | 37.5 ± 1.0 | 14.4 ± 0.7 | 5.6 ± 0.5 | 3.1 ± 0.3 | 29.77b |
| ChCl: 1-Napht | 3.8 ± 0.6 | 1.3 ± 0.2 | 0.7 ± 0.1 | 0.5 ± 0.05 | 0.1 ± 0.05 | 1.33d |

Experiments were replicated three times and represented as mean ± standard deviation

The mean values having same superscript are non-significant (p > 0.05) as per Tukey multiple range test

**Fig S1: Graph between dielectric constant of deep eutectic solvents and frequency**

**Table S8: Conductivity of various deep eutectic solvents**

| **S. No.** | **Deep Eutectic Solvents** | **Conductivity (mS/m)** |
| --- | --- | --- |
| 1 | ChCl: Urea | 40.570d ± 0.311 |
| 2 | ChCl: CA | 0.4944f ± 0.0003 |
| 3 | ChCl: OA | 47.452c ± 0.129 |
| 4 | ChCl: Gly | 49.755b ± 0.208 |
| 5 | ChCl: EG | 79.907a ± 0.438 |
| 6 | ChCl: Glu | 0.4635f ± 0.02 |
| 7 | ChCl: Suc | 0.0031g ± 0.0002 |
| 8 | ChCl: 1-Napht | 9.5718e ± 0.045 |

Mean values followed with different superscripts are significantly different (p<0.05) using Tukey’s Test

**Fig S2: Comparison of ionic conductivities of various deep eutectic solvents**

**PREPARATION OF EXTRACTS**

The extracts of leaves and flowers of *Catharanthus roseus* were prepared using ultrasound assisted extraction technique with different types of DES solvents.

**Ultrasonic-assisted extraction technique:**

The container containing 50 mg of dried leaves and flower powder of *C. roseus* in 10 ml of deep eutectic solvents was subjected to sonication extraction technique by using SB-5200 DTDN ultrasonicator for 40 mins at room temperature, respectively. The extracts prepared by this technique were either directly filtered to obtain the filterate or were centrifuged first and then filtration was performed.

**PHYTOCHEMICAL ANALYSIS**

The different leaves and flowers DES extracts of *C. roseus* were screened for the presence of various bioactive compounds present in the plant.

**Qualitative analysis of extracts**

Qualitative analysis of various DES extracts of leaves and flowers of *C. roseus* were carried out using the procedures given by Kapoor and Rani (2019).

**Alkaloids**

Various extracts (1.0 ml) of leaves and flowers were taken in the test tubes and 2.0 ml of concentrated hydrochloric acid (HCl) was added into it along with few drops of Mayer’s reagent, which was prepared by mixing 1.36 g of mercuric chloride (HgCl2) and 5.0 g of potassium iodide (KI) in 100.0 ml of water. The presence of alkaloids was detected by the formation of orange-colored precipitates.

**Amino acids**

2.0 ml of extract of leaves and flowers were taken in the test tubes and was treated with one drop of 2% copper sulfate solution (CuSO4). To this, 1.0 ml of 95% ethanol (C2H5OH) followed by an excess of potassium hydroxide (KOH) pellets were added. The purple color in the ethanolic layers indicated the presence of amino acids.

**Carbohydrates**

1.0 ml of the various extracts of leaves and flowers were boiled on the water bath along with 1.0 ml of Fehling solution A and B. Formation of red precipitates indicated the presence of carbohydrates.

**Flavonoid**

1.0 ml of the extract was taken in a test tube separately. Then a few pieces of magnesium turnings and a few drops of concentrated hydrochloric acid were added to it (HCl). The presence of flavonoids was indicated by the formation of a red or pink colored solution.

**Glycosides**

1.0 ml of glacial acetic acid (CH3COOH) was added into 2.5 ml of plant extract, followed by addition of 1 drop of 2.0% ferric chloride solution (FeCl3) and 0.5 ml of concentrated sulfuric acid (H2SO4). The formation of a reddish-brown steroidal ring indicated the presence of glycosides.

**Phenol**

2.0 ml of plant extract taken in a test tube was tested for phenols by addition of 3-4 drops of ferric chloride (FeCl3). The formation of a dark green colored solution indicated the presence of phenol.

**Saponin**

5.0 ml of distilled water (H2O) was added to 1.0 ml of various extracts taken in a test tube. The obtained mixture was vortexed and shaken vigorously. The formation of stable foam indicated the presence of saponin.

**Tannins**

2.0 ml of the plant extract of leaves and flowers were mixed with 10% alcoholic ferric chloride solution (FeCl3). The appearance of the dark blue or greenish-grey color of the solution indicated the presence of tannins.

**Terpenoids**

1.0 ml of various extracts of *C. roseus* were taken in the test tubes and treated with 1.0 ml of chloroform (CHCl3). Then, concentrated sulfuric acid (H2SO4) was added to it carefully. The appearance of reddish-brown colored ring at the interface showed the presence of terpenoids.

**Cardiac glycoside**

5.0 ml of leaves and flowers extract in test tubes were treated with 2.0 ml of sodium picrate reagent (C6H2N3NaO7). The appearance of yellow to orange color in the test tube confirmed the presence of cardiac glycosides.

**Table S9: Phytochemical analysis of *C. roseus* leaves and flowers DES extracts**

| **Extracts** | **Chemical Constituents** | | | | | | | | | |
| --- | --- | --- | --- | --- | --- | --- | --- | --- | --- | --- |
| **Alkaloids** | **Flavonoids** | **Terpenoids** | **Phenols** | **Tannins** | **Saponins** | **Glycosides** | **Amino acids** | **Carbohydrates** | **Cardiac Glycosides** |
| **Leave Extracts** | | | | | | | | | | |
| ChCl: Urea | + | + | - | - | + | - | - | + | - | - |
| ChCl: CA | + | + | + | + | + | - | + | + | + | + |
| ChCl: OA | + | + | + | + | - | - | + | + | - | + |
| ChCl: Gly | + | + | + | + | + | - | + | - | - | - |
| ChCl: EG | + | + | + | + | - | - | + | - | - | - |
| ChCl: Glu | + | + | - | - | - | - | + | + | + | - |
| ChCl: Suc | + | - | + | - | - | - | + | - | + | - |
| ChCl: 1-Napht  57 | + | - | - | + | - | - | - | - | - | - |
| Methanol | + | + | + | + | + | + | + | + | + | + |
| **Flower Extracts** | | | | | | | | | | |
| ChCl: Urea | + | + | - | - | - | - | - | - | - | - |
| ChCl: CA | + | + | + | + | + | - | + | + | + | + |
| ChCl: OA | + | + | + | - | + | - | + | + | - | + |
| ChCl: Gly | + | + | + | - | - | - | + | + | - | - |
| ChCl: EG | + | + | + | + | - | - | + | - | - | + |
| ChCl: Glu | + | + | - | - | - | - | - | - | + | - |
| ChCl: Suc | + | - | + | - | - | - | + | - | + | - |
| ChCl: 1-Napht | + | + | - | + | - | - | - | - | - | - |
| Methanol | + | + | + | + | + | + | + | + | + | + |

(+) = Presence and (-) = Absence

**Quantitative analysis of extracts**

The quantitative analysis of *C. roseus* leaves and flowers extracts for flavonoid and tannin content were performed in accordance with the procedure given by Lahare *et al* (2021).

**Flavonoid determination**

The values for TFC were calculated using the calibration curve of quercetin as a standard. The flavonoid content was expressed as milligram of quercetin equivalent per gram of dry extract (mg QE/g dw).

**Schematic representation of methodology of total flavonoid content**

**Tannin determination**

Total tannin content was calculated from the calibration curve using tannic acid as standard. The results were expressed in milligrams of tannic acid equivalents per gram of dry extract (mg TAE/g dw).

**Schematic representation of methodology of tannin content**

**Table S10: Total flavonoid content of different DES extracts of leaves and flowers of *C. roseus***

| **S. No.** | **Extract** | **Leaves**  **(mg QE/g dry weight)** | **Flowers**  **(mg QE/g dry weight)** |
| --- | --- | --- | --- |
| 1 | ChCl: Urea | 27.76c ± 0.041 | 25.81c ± 0.066 |
| 2 | ChCl: CA | 31.24a ± 0.055 | 29.25a ± 0.055 |
| 3 | ChCl: OA | 30.14b ± 0.005 | 27.84b ± 1.151 |
| 4 | ChCl: Gly | 24.43e ± 0.064 | 21.89f ± 0.081 |
| 5 | ChCl: EG | 25.18d ± 0.036 | 24.22d ± 0.030 |
| 6 | ChCl: Glu | 18.60f ± 0.045 | 15.16g ± 0.260 |
| 7 | ChCl: Suc | 28.22c ± 0.030 | 23.36e ± 0.045 |
| 8 | ChCl: 1-Napht | 13.29g ± 0.119 | 12.04h ± 0.050 |
| 9 | Methanol | 32.24a ± 0.055 | 29.25a ± 0.055 |

Mean values followed with different superscripts are significantly different (p<0.05) using Tukey’s Test

**Table S11: Tannin content of different DES extracts of leaves and flowers of *C. roseus***

| **S. No.** | **Extract** | **Leaves**  **(mg TAE/g dry weight)** | **Flowers**  **(mg TAE/g dry weight)** |
| --- | --- | --- | --- |
| 1 | ChCl: Urea | 12.03c ± 0.105 | 9.74c ± 0.283 |
| 2 | ChCl: CA | 22.30a ± 0.151 | 18.78a ± 0.156 |
| 3 | ChCl: OA | 18.69b ± 0.083 | 11.37b ± 0.198 |
| 4 | ChCl: Gly | 5.66d ± 0.175 | 4.88d ± 0.09 |
| 5 | ChCl: EG | 4.87e ± 0.091 | 3.69e ± 0.23 |
| 6 | ChCl: Glu | 1.76h ± 0.57 | 1.29g ± 0.189 |
| 7 | ChCl: Suc | 3.37g ± 0.24 | 2.26f ± 0.355 |
| 8 | ChCl: 1-Napht | 4.21f ± 0.525 | 2.50f± 0.324 |
| 9 | Methanol | 23.30a ± 0.151 | 18.78a ± 0.156 |

Mean values followed with different superscripts are significantly different (p<0.05) using Tukey’s Test

**Quantification Using UV-Visible Spectrophotometer**

The extraction efficiency of the various DES was evaluated by quantifying the vinblastine and vincristine content in the leaves and flower extracts of *C. roseus* using a UV-visible spectrophotometer. The standards vinblastine sulfate and vincristine sulfate were used to identify the characteristic absorption peaks (λmax values) at room temperature over the wavelength range of 200 nm to 400 nm (Jeewantha et al. 2017).

**Figure S3: UV absorption spectrum of vinblastine sulfate used as the standard**

**Figure S4: UV absorption spectrum of vincristine sulfate used as the standard**

The UV absorption spectra revealed that the maximum absorption of vinblastine occurred at wavelengths (λmax) of 214 nm and 254 nm, while for vincristine, the wavelengths (λmax) were 216 nm and 256 nm. These λmax values were used to develop standard curves for vinblastine and vincristine using various concentrations (5, 10, 15, 20, and 25 µg/ml) of each standard. These standard curves were further used to calculate the amount of vinblastine and vincristine content in each DES extract (Jeewantha et al. 2017).

**Response Surface Methodology (RSM) Studies**

In RSM, the Box-Behnken design (BBD) was applied to set the experimental design for the DES that yielded the highest amount of vinblastine and vincristine in pure DES extracts. This was done to determine the optimal conditions for extracting these compounds. The three independent variables used for this experiment were dilutions (30%, 40%, and 50%), extraction time (20, 40, and 60 minutes), and solid/liquid ratio (10, 30, and 50 mg/ml).

**Results and Discussion**

(a)

(b)

**Figure S5:** Extraction efficacy of eight deep eutectic solvents (DESs) (a) vinblastine content (b) vincristine content. Data was analyzed using one-way ANOVA followed by Tukey’s Test, which showed significant differences (p<0.05) among the values.

**References**

1. Abbott AP, Capper G, Gray S. 2006. Design of improved deep eutectic solvents using hole theory. *ChemPhysChem,* 7(4), 803-806.
2. Demir A, Fesliyan S, Altunay N, Soylak M. 2024. Deep eutectic solvent-based sonication assisted dispersive liquid-liquid microextraction using Box-Behnken optimization for the determination of patent blue V in food and drug samples. J Food Compos Anal. 135:106634. <https://doi.org/10.1016/j.jfca.2024.106634>
3. Jeewantha HA, Ivanovich SA, Mihailovich KP. 2017. Validated spectrophotometric method for the estimation of vincristine and vinblastine. Int J Pharm Pharm Sci. 9(4):1-9.
4. Pall R, Mohsenin NN. 1980. A soil air pycnometer for determination of porosity and particle density. ASABE. 23(3):0735-41.
5. Beaulieu LY, Logan ER, Gering KL, Dahn JR. 2017. An automated system for performing continuous viscosity versus temperature measurements of fluids using an Ostwald viscometer. Rev Sci Instrum. 88:095101.
6. Shahbaz K, Bagh FSG, Mjalli FS, AlNashef IM, Hashim MA. 2013. Prediction of refractive index and density of deep eutectic solvents using atomic contributions. Fluid Ph Equilibria. 354:304-11.
7. Skulcova A, Russ A, Jablonsky M, Sima J. 2018. The pH behavior of seventeen deep eutectic solvents. Bioresources. 13(3):5042-51.
8. Mukherjee K, Das A, Choudhury S, Barman A, Biswas R. 2015. Dielectric relaxations of (acetamide + electrolyte) deep eutectic solvents in the frequency window, 0.2 ≤ ν/GHz ≤ 50: anion and cation dependence. J Phys Chem B. 119:8063-71.
9. Lahare RP, Yadav HS, Bisen YK, Dashahre AK. 2021. Estimation of total phenol, flavonoid, tannin and alkaloid content in different extracts of Catharanthus roseus from Durg District, Chandigarh, India. Sch Bull. 7(1):1-6.


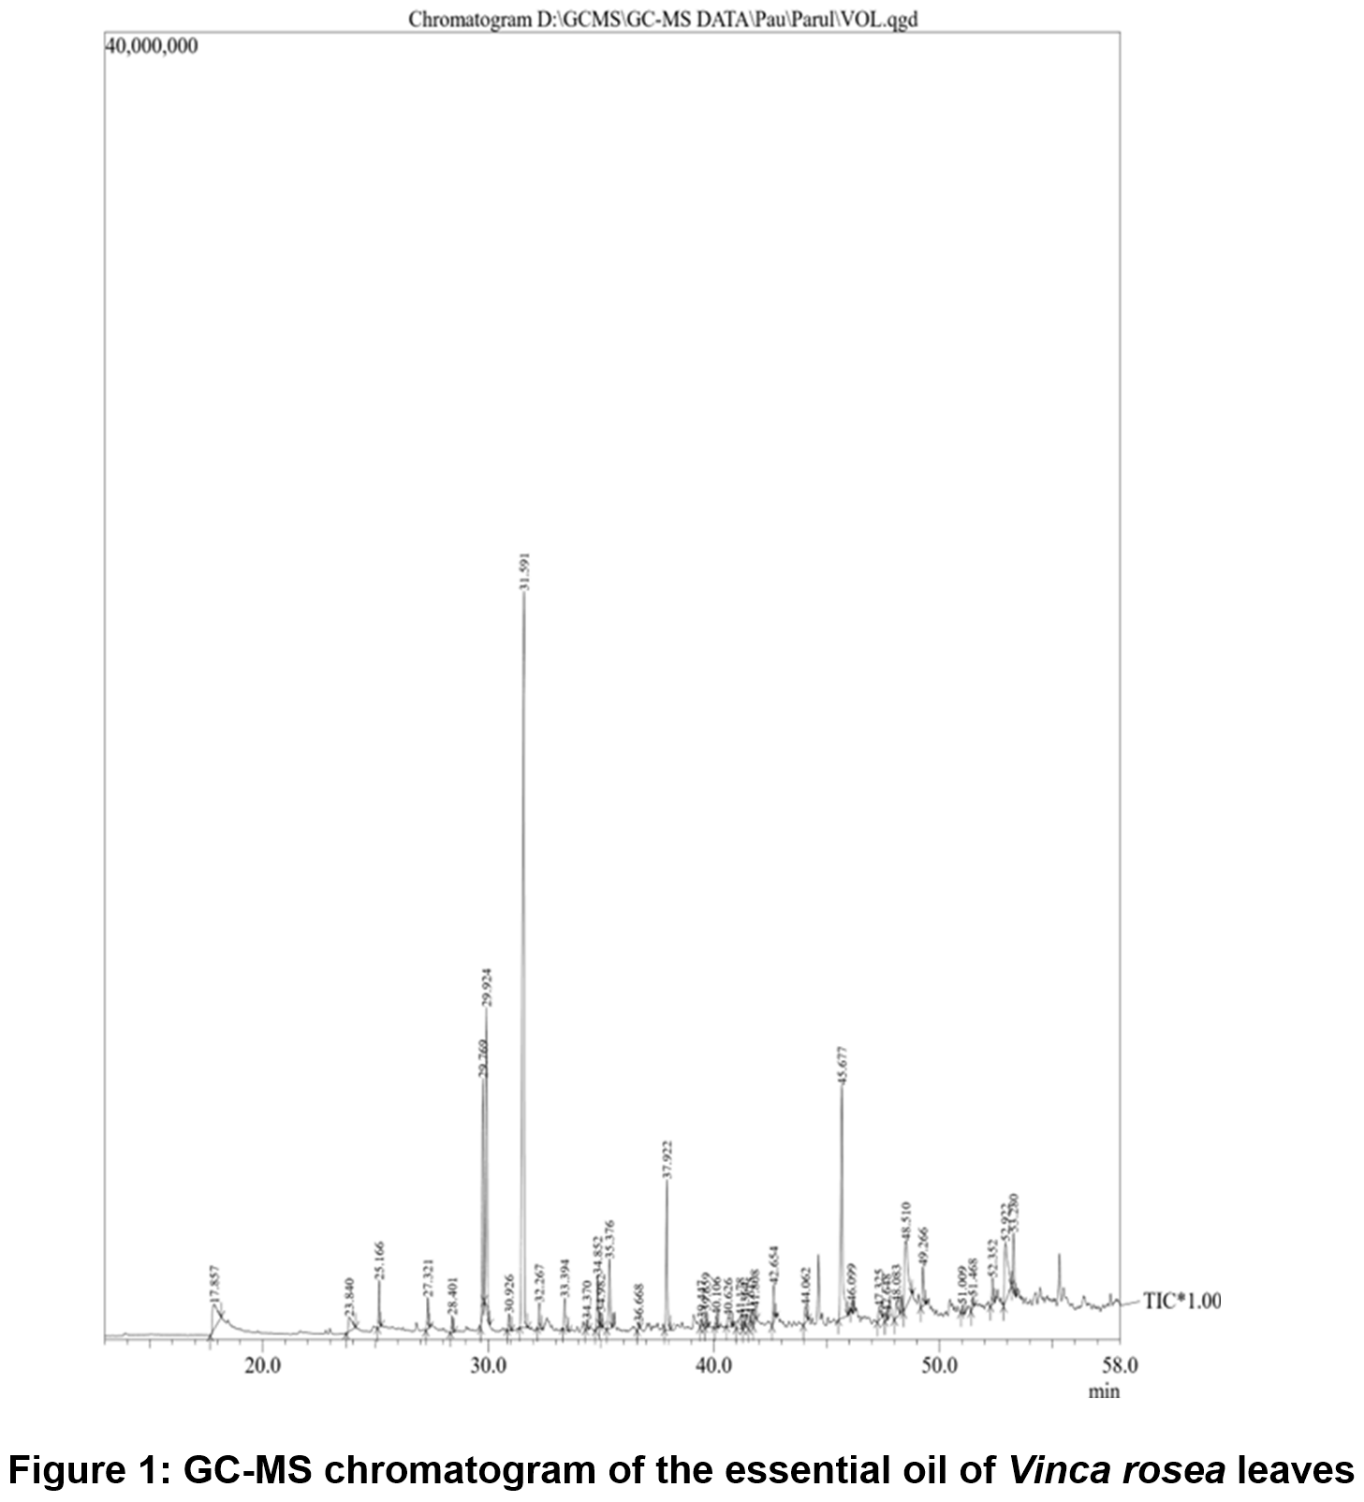


**Figure S6: GC-MS Chromatogram of Methanol extract**


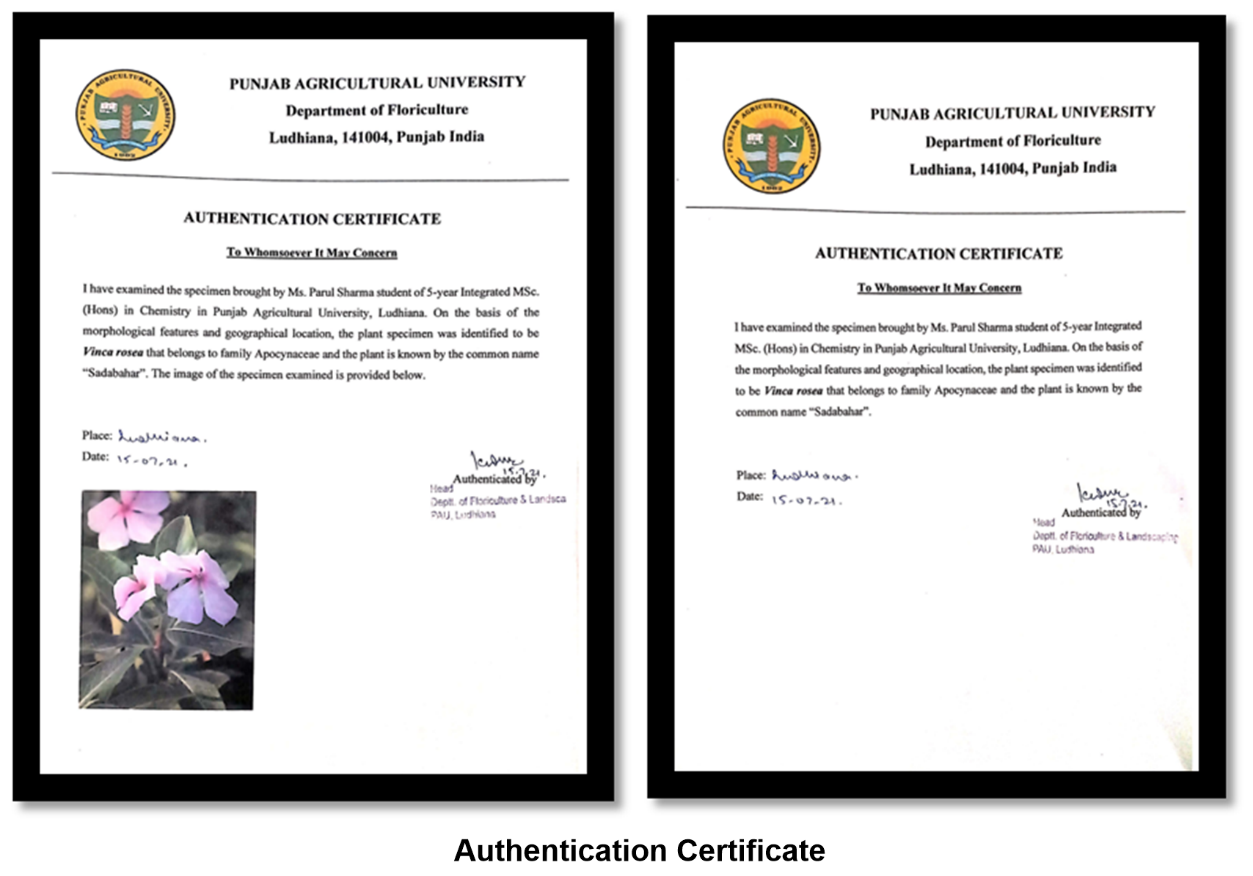

Supplement: Supplementary file 1 [file 37f79b77d3ac998572a79e48.docx]
